# Supplementary material
Source: Springer Nature journal article supplement (https://www.springermedizin.de/resource/supplementary/12884_2008_211_MOESM2_ESM.pdf/9459856)

CHOOSE A TOPIC

Decide on Criteria of Good Care  
Observe Practice

Decide on and  
Implement any  
necessary changes

Set Standards

Compare actual performance  
with standard

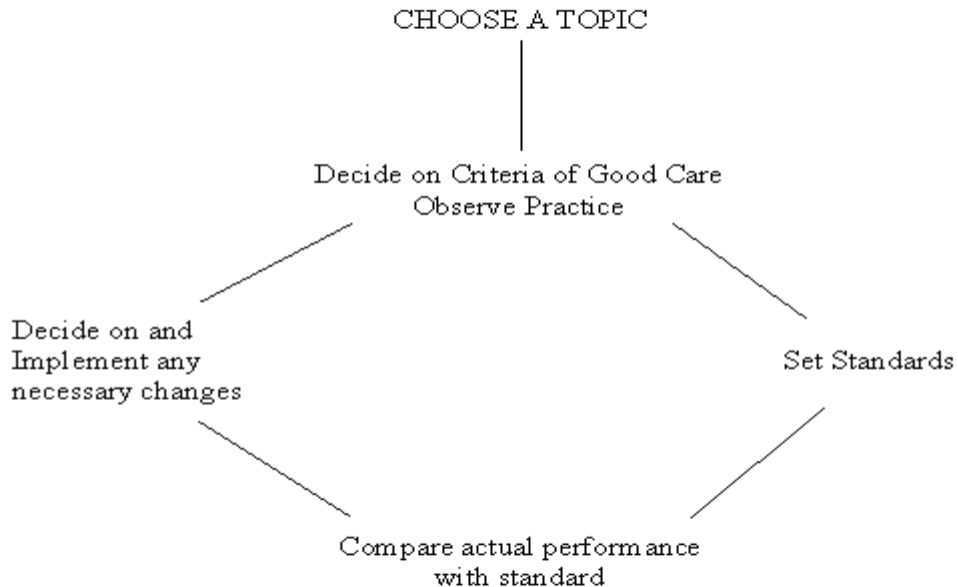

Supplement: MOESM2 [file 9459856]
